# Supplementary material for: Gender climate in Indian oncology: national survey report
Source: PubMed Central journal article supplement — ESMO Open. 2020 Apr 29;5(2):e000671. doi: 10.1136/esmoopen-2020-000671 (PMC7213870; doi:10.1136/esmoopen-2020-000671), 2020-04-29
Supplement: esmoopen-2020-000671supp001.pdf [file esmoopen-2020-000671supp001.pdf]

**SUPPLEMENT 1****EXPLORATORY STUDY ON THE CHALLENGES OF FEMALE ONCOLOGISTS IN INDIA**

1. Name
2. Phone number
3. Place of work
4. Age \*
5. **Region of work\***
  - Western India/Eastern India/Central India/North India/South India
6. **Primary profession \***
  - Medical oncologist
  - Clinical oncologist
  - Academic/scientific/clinical research
  - Trainee/resident
  - Others
7. **Setting of work\***
  - University hospital
  - Private nursing home
  - Corporate hospital
  - Others
8. **Team details\***
  - i. Manager: male/female
  - ii. Proportion of female and male oncologists in the team
  - iii. Role in the team
    - No leadership/managerial role
    - Leadership
    - Leadership or managerial not specified
    - Coordinating function
9. **As a female oncologist, what do you think you can uniquely bring to the oncology profession?\***
  - Multi-tasking ability
  - Ability to listen to and enter into a dialogue
  - Understanding of the human side
  - Practical organizational skills
  - High professionalism
  - Smoother communication with patients
  - Holistic view of the disease
  - Effective management of working team
  - None of the above

**10. As a female oncologist, what do you think are the 3 obstacles or challenges to your career progression?\***

- Finding a balance between work and family
- Man perceived as natural leaders while women perceived more as a team members and supporters
- Managing and organising family commitments
- Barriers to travel to attend international meetings
- Cultural gender prejudice due to misconceptions about family and domestic responsibilities of women
- Difficulty to spend time abroad at different institute for research fellowship
- Maternity leave and difficulties in coming back to work
- Financial constraints related to lower salaries

**11. Which of the following programs aimed at female professionals would you advise to implement to support the professional career development of female oncologists?\***

- Flexible education/fellowship program
- Network of women oncologists
- Dedicated seats for women in committees
- Family friendly facilities at the congress
- Soft-skills training
- Online professional career development tools
- Mentorship program
- Bonus for re-entering work place

\*Mandatory fields
